# Supplementary material for: Accumulation of autophagosomes confers cytotoxicity
Source: PubMed Central journal article supplement (PMC5566519; doi:10.1074/jbc.m117.782276), 2017-07-03

## SUPPLEMENTAL FIGURE LEGENDS

### **Figure S1. Rapamycin and chloroquine synergistically induces cell viability loss**

SK-N-SH cells were treated with rapamycin (Rap) (2 $\mu$ M), chloroquine (CQ) (25 $\mu$ M) or Rap + CQ for 72hrs. Cell viability was measured with MTT assay (n=4 per condition). Data are shown as mean  $\pm$ sd. \*\*\*: P<0.001.

### **Figure S2. Dual mTOR/STX17 knockdown causes viability loss in addition to reducing cell proliferation**

HEK293 cells were transfected with control, mTOR, syntaxin-17 (STX17), or mTOR+STX17 siRNA as indicated for 72hrs, then measured for cell proliferation via BrdU assay (**i**) and viability via MTT assay (**ii**). The ratio of viability/proliferation in each treatment was calculated as corrected viability reading (without proliferation factor) (**iii**) (n=6 per condition). Data are shown as mean  $\pm$ sd. \*: P<0.05; \*\*\*: P<0.001.

### **Figure S3. Chemical induction of autophagosome synthesis and blockade of autophagosome-lysosome fusion synergistically lead to cell viability loss**

**A.** RT4-D6P2T (RT4) cells were treated with vehicle, PI-103 (PI) (0.1  $\mu$ M), Bafilomycin A1 (Baf) (10 nM) or PI+Baf for 24hrs. Cell viability was measured. Data are shown as mean $\pm$ sd. \*\*: P<0.01; \*\*\*: P<0.001. **B.** The phase-contrast images were acquired for the matching cells with the treatments as above. Scale bar: 100 $\mu$ m. **C.** RT4 cells were treated with a series of concentrations of PI-103 alone, or with Baf (10 nM) for 24 hrs. Cell viability was measured. Data are shown as mean $\pm$ sd (n=12 per condition). Data are shown as mean  $\pm$ sd. **D.** RT4 cells were treated with vehicle, rapamycin (Rap) (1 $\mu$ M), Baf (100nM), or Rap+Baf for 24hrs. Cytotoxicity was measured using the CytoTox 96 Non-Radioactive Cytotoxicity Assay (n=5 per condition). Data are shown as mean  $\pm$ sd. \*\*\*: P<0.001.

### **Figure S4. Increased synthesis/accumulation of non-fused autophagosomes through diverse targets widely induces cytotoxicity**

**A.** Wild-type (Ctrl) and LAMP1/2 DKO MEFs were subjected to time course starvations as indicated. Cell viability was measured. Data are shown as mean  $\pm$ sd. **B.** HeLa cells stably expressing GFP-LC3 were treated with control, inositol monophosphatase 1 (IMPA), SNAP29 (SNAP) or IMPA+SNAP siRNA for 72hrs,  $\pm$ chloroquine (CQ) for the last 24hrs. Cells were then fixed and imaged by confocal microscopy. The numbers of LC3 puncta per cell were quantified (n=3 repeats per condition, with at least 30 cells per repeat). Data are shown as mean  $\pm$ sd. \*: P<0.05; \*\*: P<0.01; \*\*\*: P<0.001. **C.** Representative confocal images from the cells in **B** are shown. Scale bar: 20 $\mu$ m. **D.** Human primary schwannomas were treated with CQ (25 $\mu$ M) and rilmenidine (Ril) (2.5 $\mu$ M) for 24hrs. Cell viability was measured with MTT assay. Data are shown as mean  $\pm$ SEM (n=5 per condition). \*\*\*: P<0.001.

### **Figure S5. Inhibition of autophagosome synthesis alleviates the toxicity associated with autophagosome accumulation-inducing treatments**

**A.** HEK293 cells were transfected with control or inositol monophosphatase 1 (IMPA) + SNAP29 (SNAP) siRNA, without or with Atg16L1 siRNA for 72hrs. Cell viability was measured with MTT assay (n=5 per condition). Data are shown as mean  $\pm$ SEM, with (**i**) showing all values corrected against the overall control, and (**ii**) showing IMPA+SNAP knockdowns

corrected against their respective control. \*: P<0.05; \*\*\*: P<0.001. **B.** RT4 cells were treated with a series of PI-103 (PI) concentrations with or without 3-methyladenine (3MA) (10mM) for 24hrs. Cell viability was measured. Data are shown as mean  $\pm$ sd. **C.** Atg16L1<sup>+/+</sup> or Atg16L1<sup>-/-</sup> MEFs were treated with vehicle, PI (1uM), bafilomycin-A1 (Baf) (10nM) and PI+Baf for 24hrs. Cell viability was measured. Data are shown as mean  $\pm$ sd (n=12 per condition). \*\*\*: P<0.001.

**Figure S6. Treatments of autophagosome induction and lysosomal inhibition cause cell death independent of apoptosis and necroptosis**

**A.** RT4 cells were treated with vehicle, PI-103 (PI) (0.5uM), chloroquine (CQ) (25uM), zVAD (20uM) and Nec (20uM) as indicated for 20hrs. Cell death was measured with propidium iodide staining in flow cytometry (n=6 per treatment). **B.** Data are shown as mean  $\pm$ sd. \*: P<0.05; \*\*\*: P<0.001; ns=not significant.

**Figure S7. Lowering accumulation of autophagosomes by partial depletion of autophagosome synthesis alleviates the toxicity of mutant huntingtin aggregation**

**A.** SK-N-SH cells were transfected with RFP-HTT-21Q (wt) or RFP-HTT-72Q (mut) for 48hrs. Cells were then stained with LysoSensor Green DND-189 for 30min. Live cell images were acquired with confocal microscopy. Scale bar: 20um. **B.** SK-N-SH cells were transfected with GFP-HTT-21Q (wt) or GFP-HTT-72Q (mut) for 48hrs. Cells were then fixed, stained with DAPI and imaged with confocal microscopy. The numbers of abnormal nuclei were quantified (~200 cells per repeat, n=3 per experiment). Data are shown as mean  $\pm$ sd. \*\*: P<0.01. **C.** mRFP-GFP-LC3 cells were treated with control or Beclin 1 siRNA for 48hrs. Cells were fixed and imaged with confocal microscopy. Scale bar: 20um. **D.** The numbers of autophagosomes (green vesicles) and autolysosomes (red vesicles minus green vesicles) from **C** were collected (n=50 cells per condition). Data are shown as mean  $\pm$ sem. \*\*\*: P<0.001. **E.** SK-N-SH cells were transfected with GFP-HTT-21Q (wt) or GFP-HTT-72Q (mut) and either control or Beclin1 siRNA (20nM) for 48hrs. Cells were then fixed, stained with DAPI and imaged with confocal microscopy. The numbers of abnormal nuclei were quantified (~200 cells per repeat, n=3 per experiment). Data are shown as mean  $\pm$ sd. \*: P<0.05; \*\*: P<0.01.

**Figure S8. Mutant synuclein does not cause lysosome deacidification**

SK-N-SH cells were transfected with RFP (Ctrl) or RFP-Syn-A53T for 48hrs. Cells were then stained with LysoSensor Green DND-189 for 30min. Live cell images were acquired with confocal microscopy. Scale bar: 20um.

Fig. S1

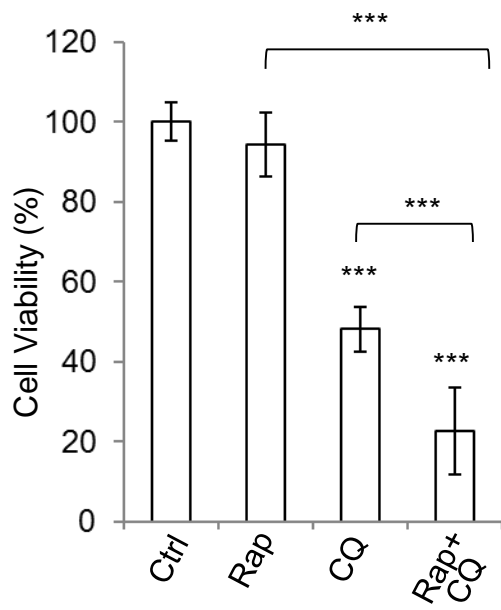

Fig. S2

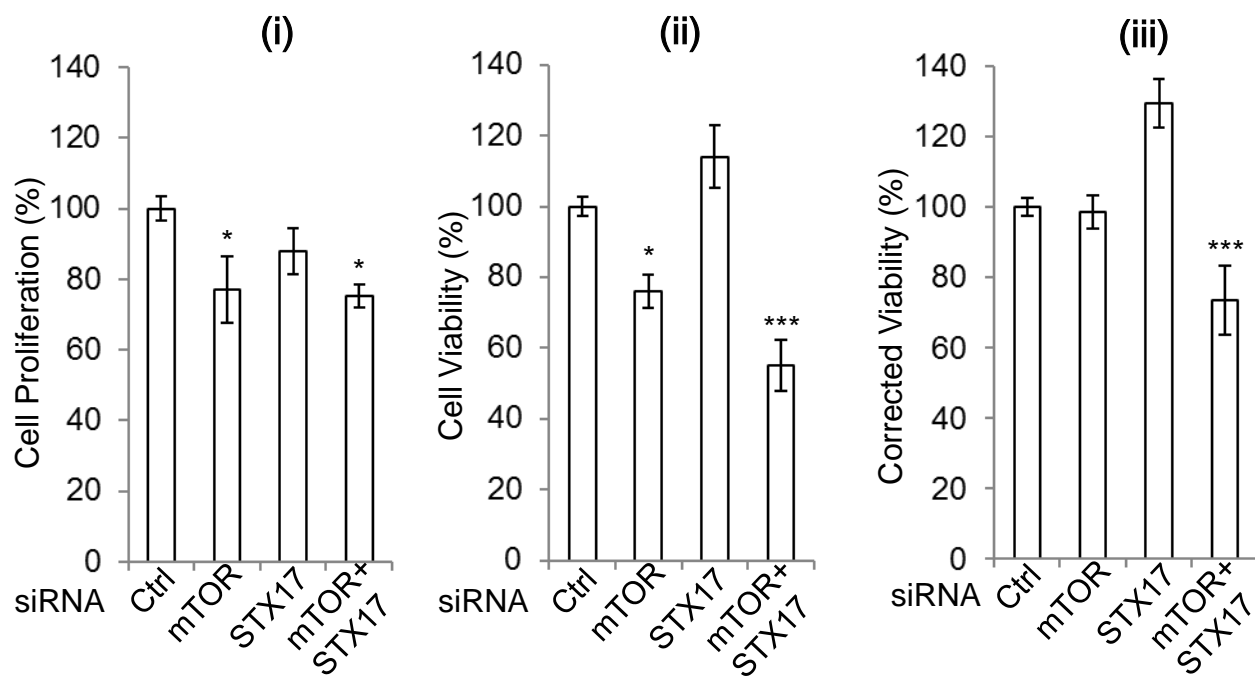

**Fig. S3**

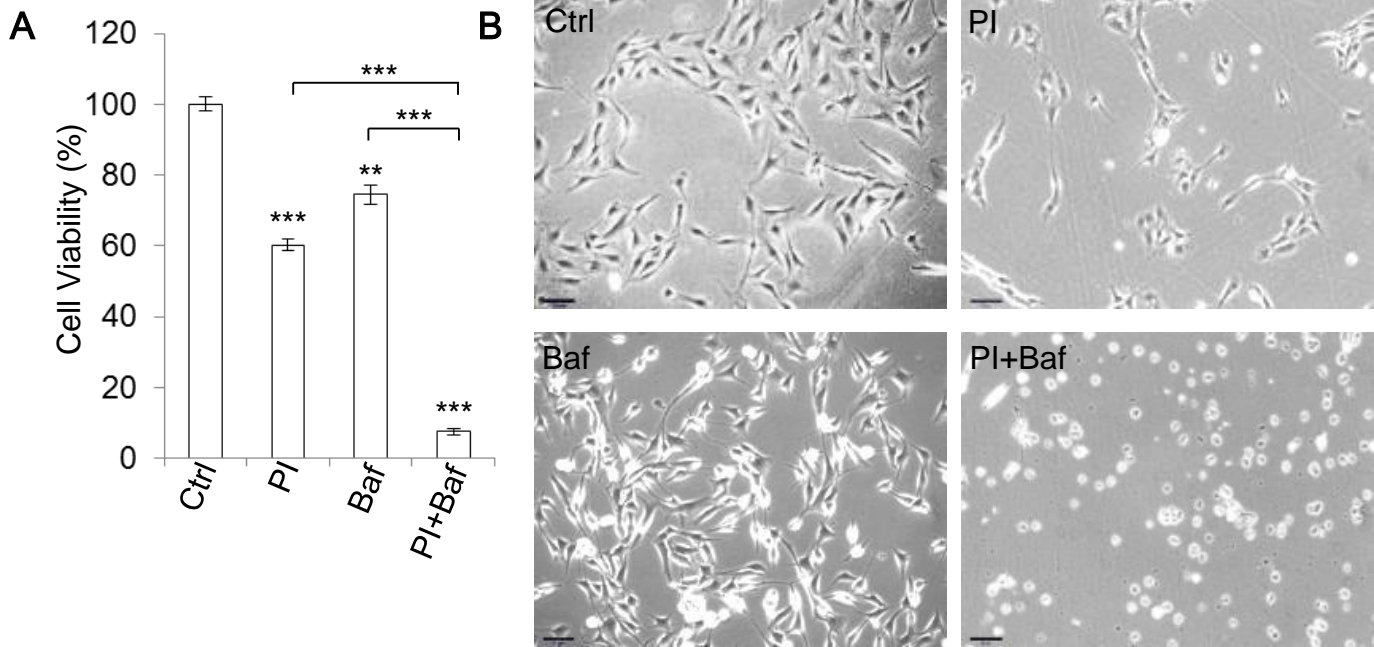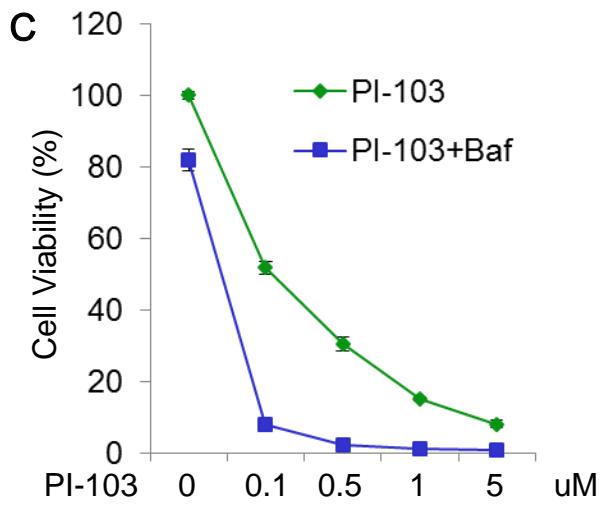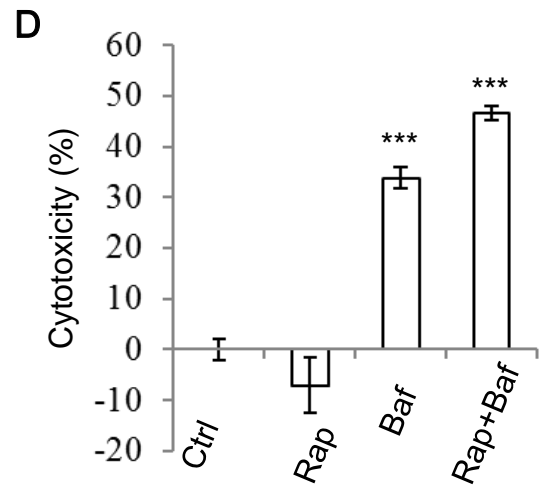

**Fig. S4**

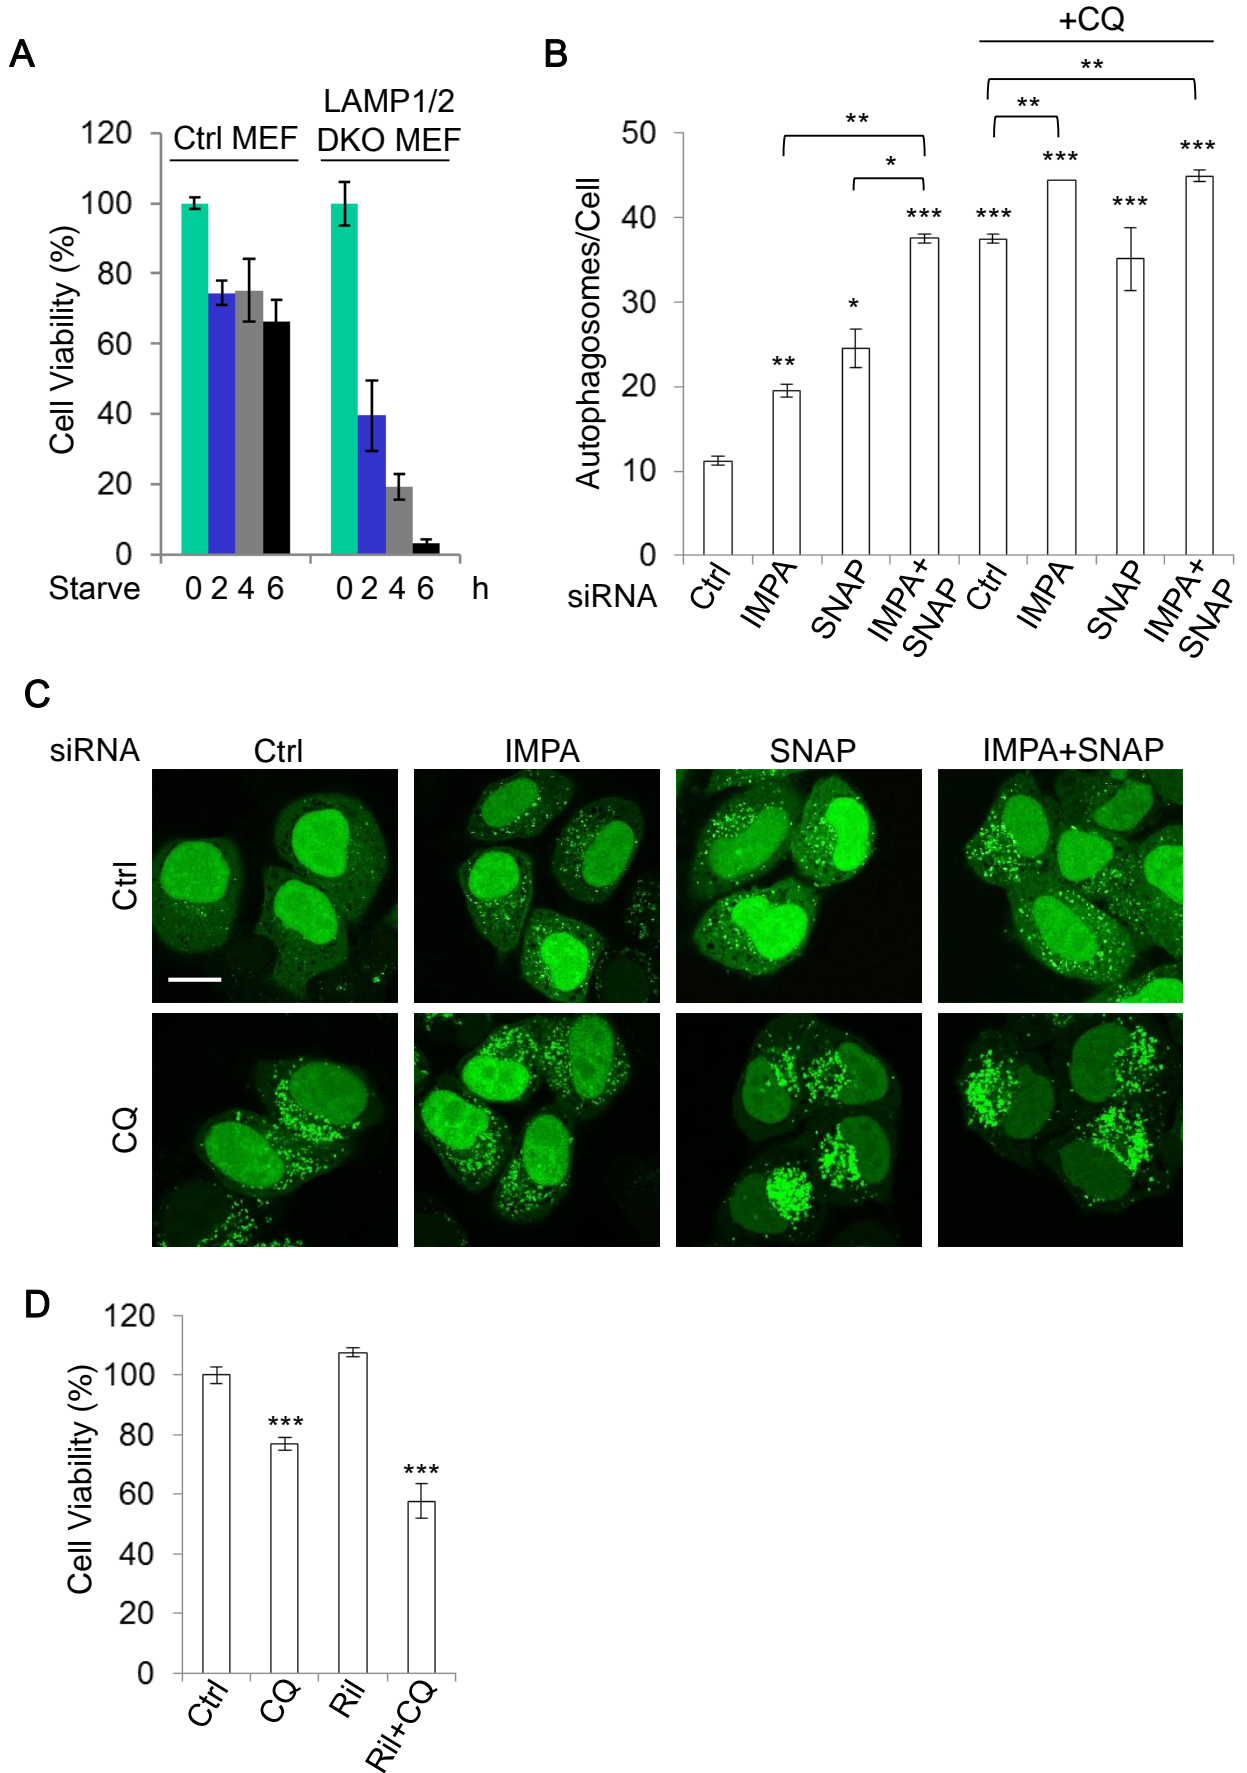

Fig. S5

**A**

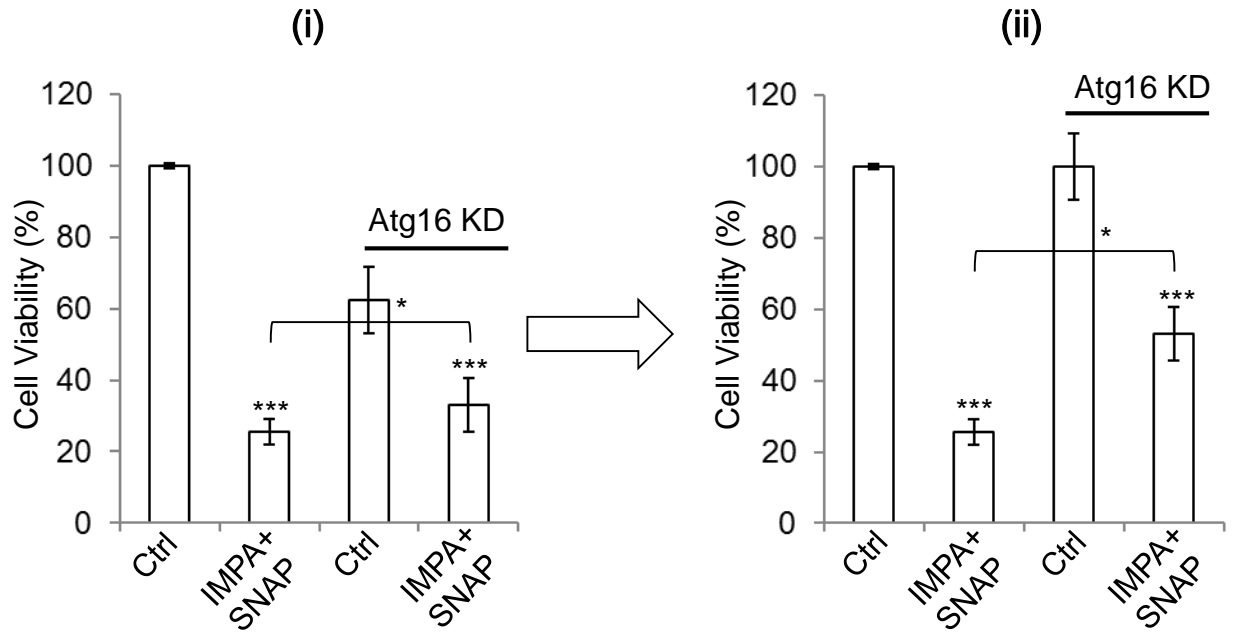

**B**

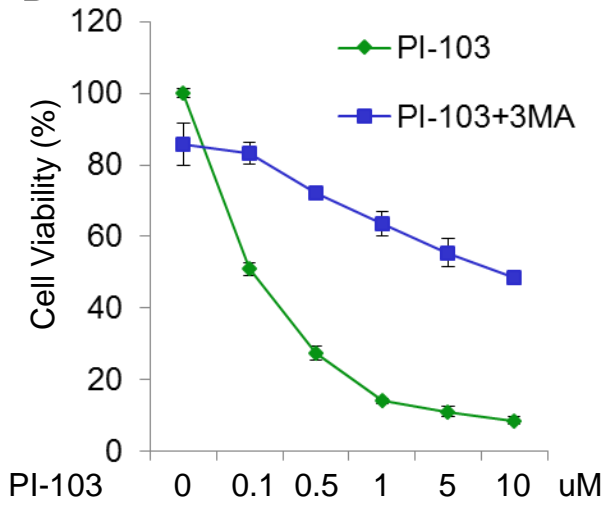

**C**

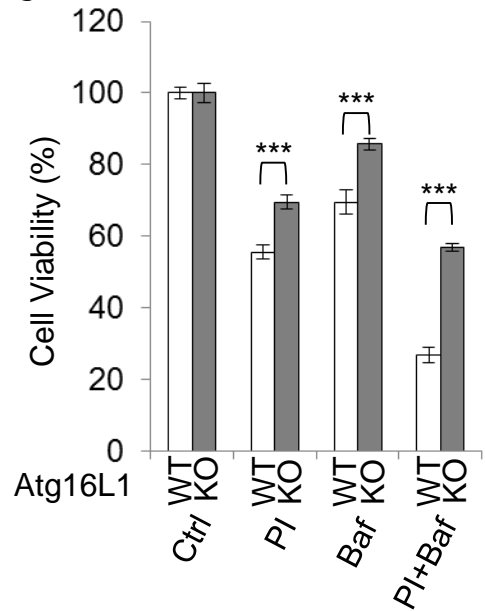

Fig. S6

A

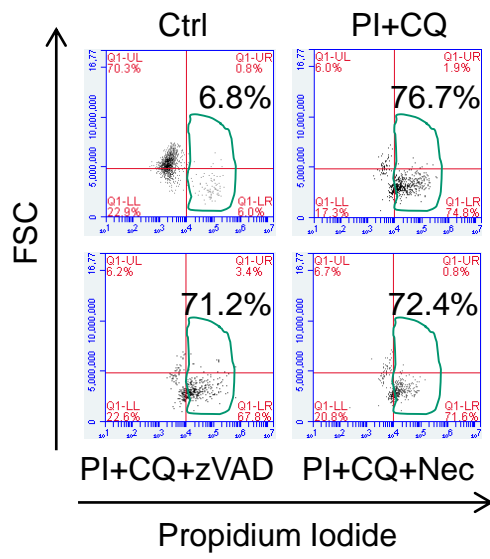

B

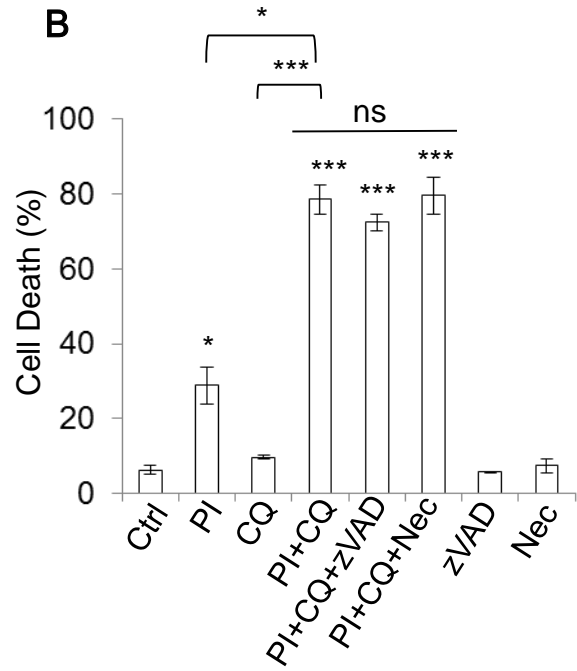



Fig. S7

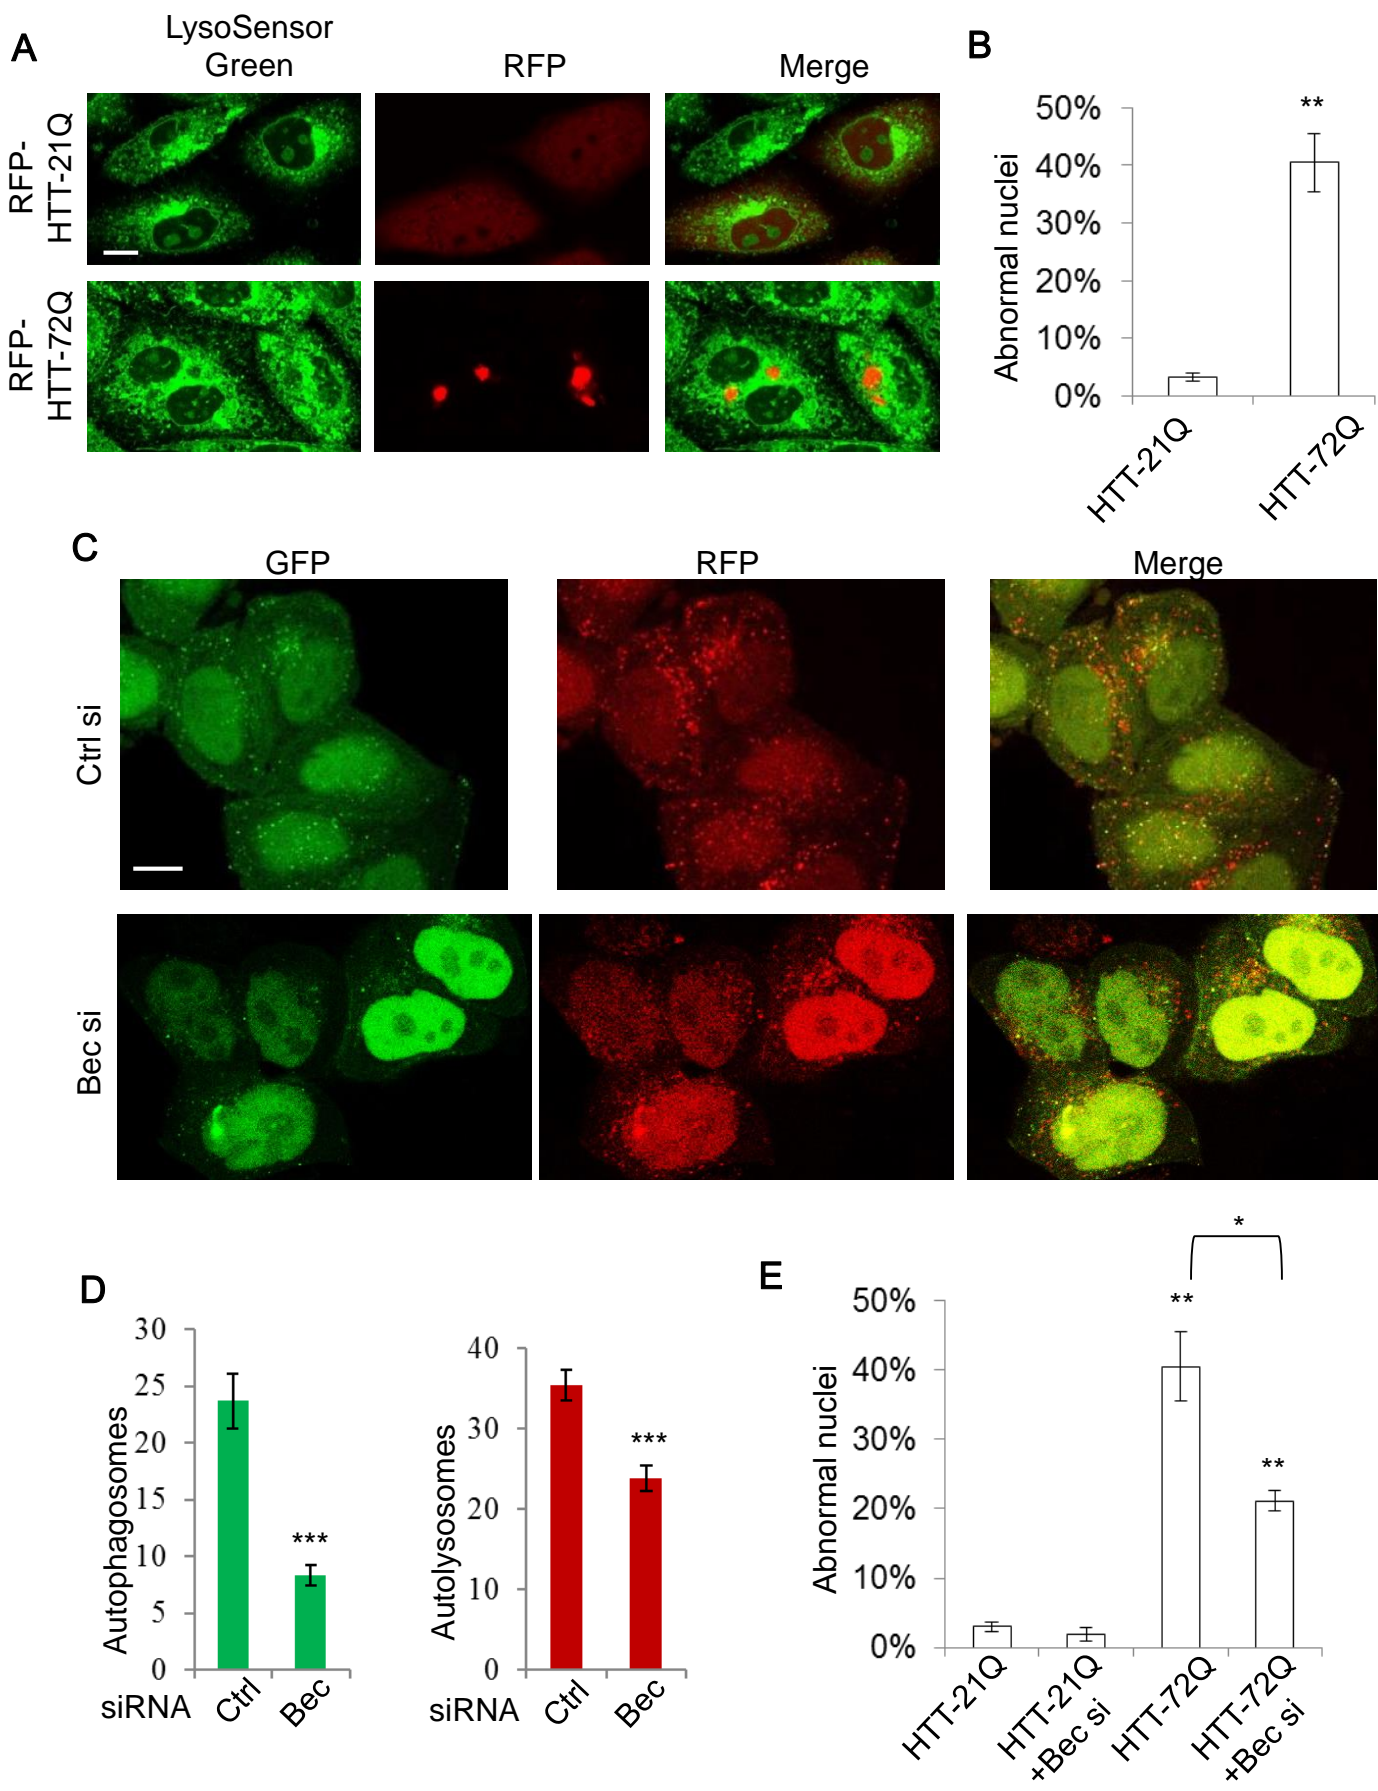

Fig. S8

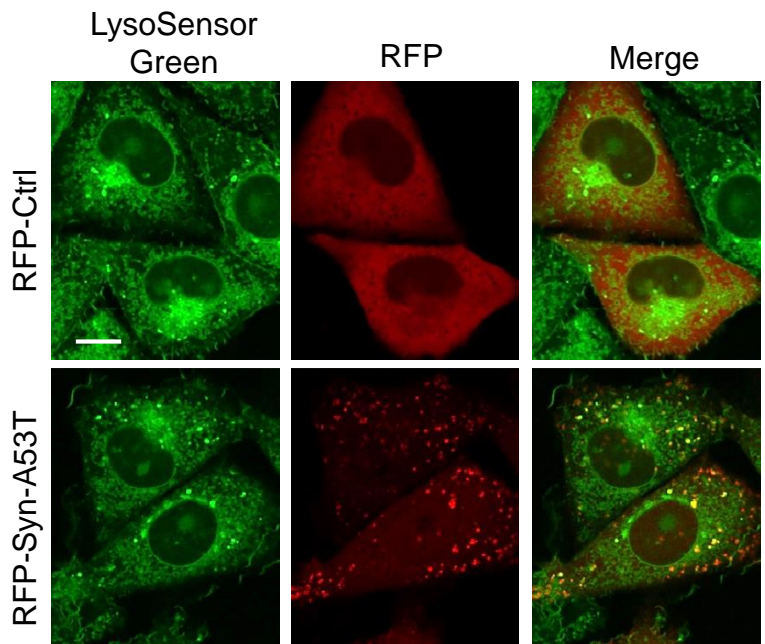

Supplement: 10.1074_M117.782276_jbc.M117.782276-1.pdf [file 10.1074_M117.782276_jbc.M117.782276-1.pdf]
